# Supplementary material for: Fabrication of substrates for multiple cell patterning using a copolymer with a UV-degradable oligoethylene glycol side chain
Source: Royal Society of Chemistry journal article supplement (doi:10.1039/d2ma00198e), 2022-01-01
Supplement: d2ma00198e1.pdf [file d2ma00198e1.pdf]

**Electronic supplementary information (ESI)**

***Fabrication of substrates for multiple cell patterning using a copolymer with a UV-degradable oligoethylene glycol side chain***

Hiroaki Ogawa, Yuka Yamazawa, Tadashi Nakaji-Hirabayashi, Hiromi Kitano,  
Yoshiyuki Saruwatari, Kazuyoshi Matsuoka

*S1. Evaluation of protein adsorption on the surface modified with polymers*

A solution of 1800  $\mu\text{L}$  PBS was put on 36 mm  $\times$  26 mm glass substrates modified with the polymer for priming treatment and was removed after 10 min. Next, 1800  $\mu\text{L}$  BSA solution was put on the substrates and kept for 2 h at 25  $^{\circ}\text{C}$ . Also, 1800  $\mu\text{L}$  PBS solution was cast on substrates to obtain a background reading at room temperature. After removing the solution, the substrates were rinsed ten times with PBS. Thereafter, BCA solution was cast on the substrates and incubated for 2 h at 37  $^{\circ}\text{C}$ . Finally, the absorbance of the BCA solution at 570 nm was measured by a microplate reader (Multiskan JX, Thermo Fisher Scientific Inc., MA). The amount of BSA adsorption on the substrates was determined by a calibration curve calculated from solutions of known concentration.

**Table S1.** X-ray photoelectron spectroscopy results for glass substrates modified with various copolymers.

| Copolymer | Atom (%)   |            |             |            |
|-----------|------------|------------|-------------|------------|
|           | C          | N          | O           | Si         |
| 85H       | 12.9 ± 0.6 | 1.8 ± 0.16 | 59.8 ± 1.1  | 25.5 ± 0.3 |
| 85H UV    | 8.1 ± 1.2  | 1.9 ± 0.20 | 60.1 ± 0.91 | 29.9 ± 0.6 |
| 90H       | 15.6 ± 0.7 | 1.7 ± 0.11 | 59.6 ± 0.63 | 23.1 ± 0.7 |
| 90H UV    | 9.9 ± 1.3  | 1.7 ± 0.05 | 60.9 ± 1.3  | 27.5 ± 0.6 |
| 95H       | 15.9 ± 3.9 | 1.6 ± 0.84 | 57.9 ± 3.4  | 24.6 ± 1.1 |
| 95H UV    | 11.3 ± 5.5 | 1.3 ± 0.77 | 58.5 ± 5.0  | 28.9 ± 1.0 |
| 85L       | 14.4 ± 1.8 | 1.4 ± 0.42 | 58.8 ± 1.3  | 25.4 ± 0.6 |
| 85L UV    | 11.9 ± 1.6 | 1.6 ± 0.38 | 59.1 ± 1.2  | 27.4 ± 0.3 |
| 90L       | 13.9 ± 2.3 | 1.4 ± 0.33 | 59.2 ± 2.8  | 25.5 ± 1.4 |
| 90L UV    | 10.8 ± 3.8 | 1.2 ± 0.42 | 61.7 ± 2.9  | 26.3 ± 3.8 |
| 95L       | 14.1 ± 5.8 | 1.3 ± 0.68 | 59.2 ± 4.6  | 25.4 ± 4.2 |
| 95L UV    | 11.5 ± 7.4 | 1.4 ± 0.81 | 60.3 ± 6.3  | 26.8 ± 0.9 |

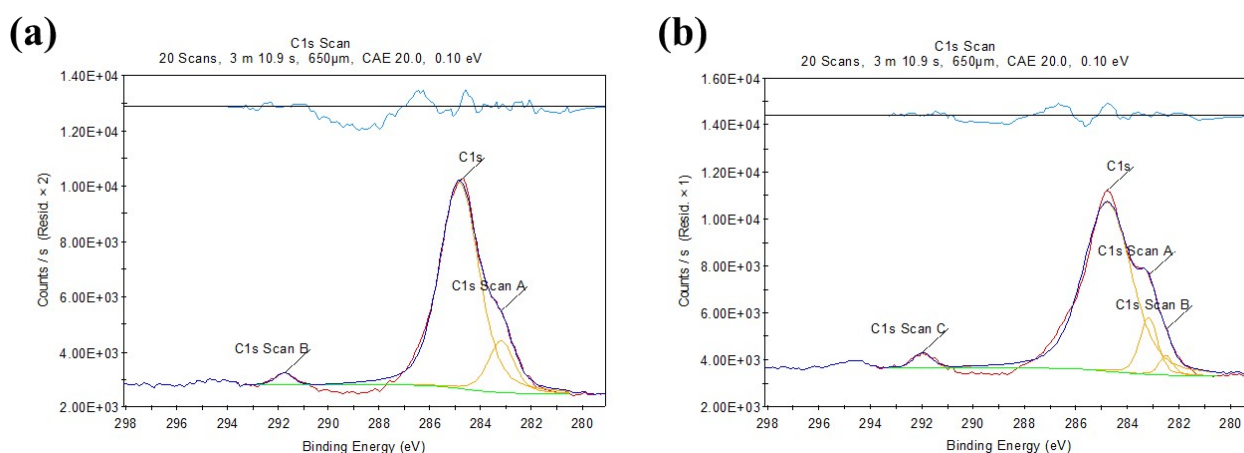

**Figure S1.** XPS spectra of substrates modified with the copolymer: (a) before; and (b) after UV irradiation.

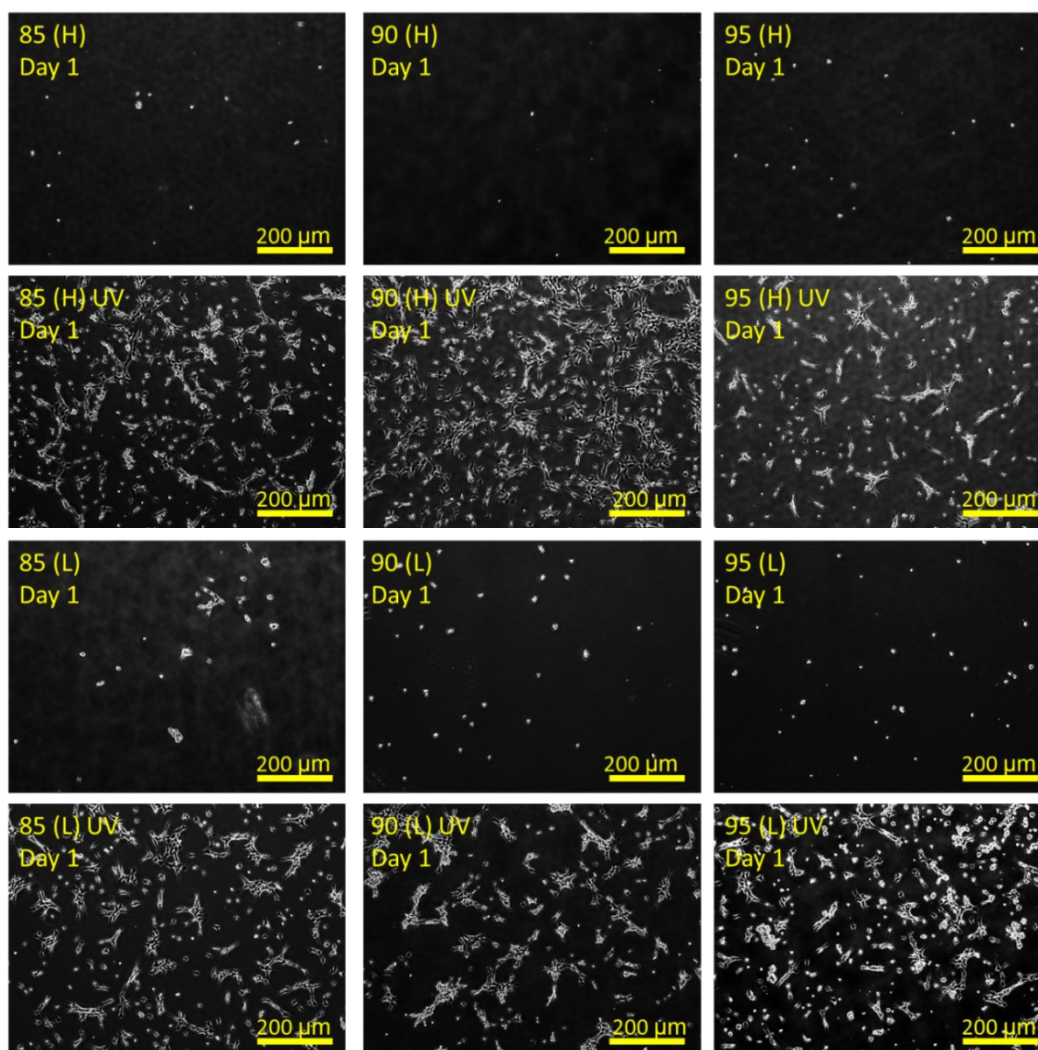

**Figure S2.** The phase contrast images (scale bar: 200 μm) of adhered cells cultured for a day on substrates modified with the copolymers before and after UV irradiation.

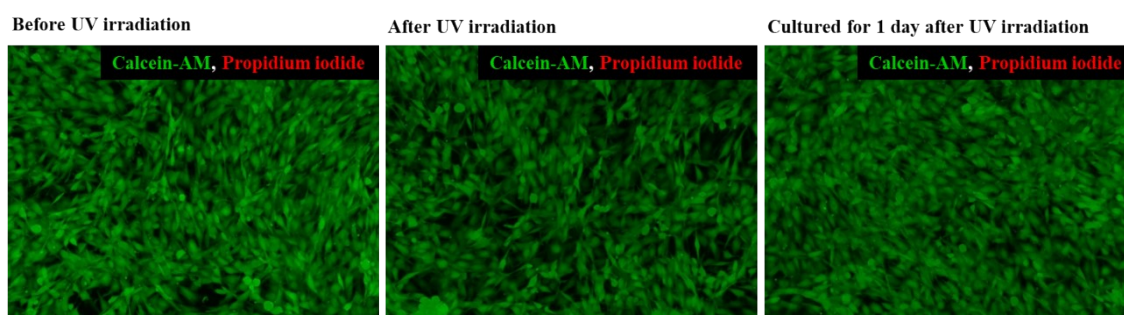

**Figure S3.** Fluorescent photographs of NIH3T3 cells stained with calcein-AM and propidium iodide before (left) and after (center) UV irradiation taken under a fluorescence microscope. Right fluorescent photograph shows calcein-AM and propidium iodide staining of the cells cultured for 1 day after UV irradiation.

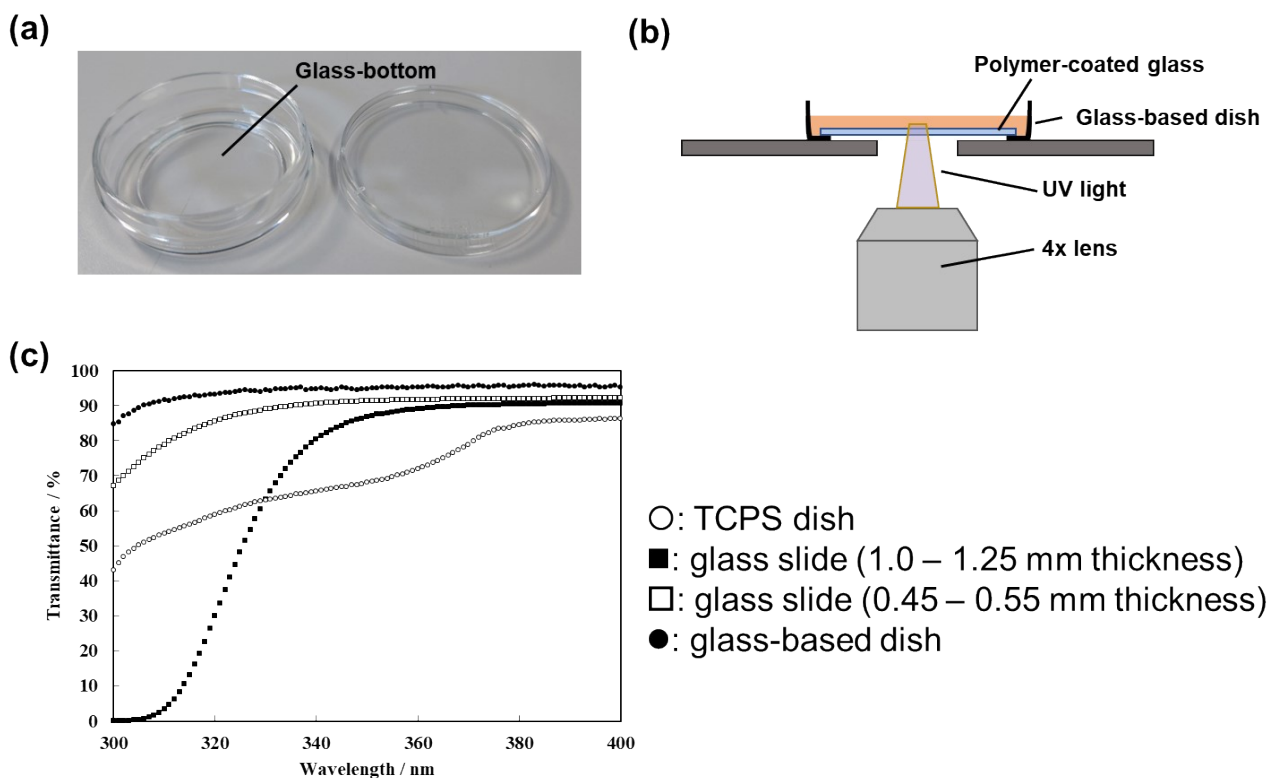

**Figure S4.** (a) Glass-based dish used in the cell-patterning experiment. The copolymer (solvent: ethanol) was added to a dish treated with  $O_2$  plasma and coated on the glass area. (b) Illustration of UV irradiation using fluorescence microscope. (c) Transmission of 300–400 nm UV light through the TCPS dish, thick glass slide (1.0–1.25 mm), thin glass slide (0.45–0.55 mm), and glass-based dish (glass thickness: 0.15–0.18 mm).
